# Supplementary material for: Effectiveness of home-based records on maternal, newborn and child health outcomes: A systematic review and meta-analysis
Source: PubMed Central journal article supplement (PMC6314587; doi:10.1371/journal.pone.0209278), 2019-01-02
Supplement: pone.0209278.s001.pdf [file pone.0209278.s001.pdf]

## Appendix I: Example Search Strategy

Database: Ovid MEDLINE(R) In-Process & Other Non-Indexed Citations, Ovid MEDLINE(R) Daily and Ovid MEDLINE(R) <1946 to Present>

- 1 exp pregnancy/
- 2 pregnant women/
- 3 exp Maternal Health Services/
- 4 prenatal care/
- 5 perinatal care/
- 6 postnatal care/
- 7 pregnan\$.kw.tw
- 8 (antenatal or perinatal or postnatal or postpartum or prenatal or maternal or mother\$).mp.
- 9 exp child/
- 10 child\$.mp.
- 11 exp infant/
- 12 infant, newborn/
- 13 (infanc\$ or infant? or neonat\$ or newborn?).mp.
- 14 or/1-13
- 15 exp Health Records, Personal/ or exp Medical Records/
- 16 ((health or medical or personal) adj2 record?).mp.
- 17 (home-based adj5 (booklet? or book? or handbook? or record? or card?)).mp.
- 18 (patient-held adj5 (booklet? or book? or handbook? or record? or card?)).mp.
- 19 (hand-held adj5 (booklet? or book? or handbook? or record? or card?)).mp.
- 20 (mobile adj5 (booklet? or book? or handbook? or record? or card?)).mp.
- 21 eHealth.kw.tw
- 22 mHealth.kw.tw
- 23 (antenatal adj5 (booklet? or book? or handbook? or record? or card?)).mp.
- 24 ((immunis\$ or immuniz\$ or vaccinat\$) adj2 (booklet? or card? or record?)).mp.
- 25 or/15-24
- 26 clinical study.pt.
- 27 controlled clinical trial.pt.
- 28 clinical trial.pt.
- 29 randomized controlled trial.pt.
- 30 pragmatic clinical trial.pt.
- 31 random\*.ab.
- 32 or/26-31
- 33 14 and 25 and 32
- 34 animals/ not (humans/ and animals/)
- 35 33 not 34
- 36 remove duplicates from 35
