# Supplementary material for: Effectiveness of home-based records on maternal, newborn and child health outcomes: A systematic review and meta-analysis
Source: PubMed Central journal article supplement (PMC6314587; doi:10.1371/journal.pone.0209278), 2019-01-02
Supplement: pone.0209278.s003.pdf [file pone.0209278.s003.pdf]

## Appendix III: GRADE Evidence Profiles

1. For women during pregnancy and after birth, and for newborns, children and caregivers (P), does use of any home-based records (I), compared with no use of any home-based records (C), improve maternal, newborn and child health outcomes (O)?

### 1.1 Maternal health

#### a. Maternal care seeking

| Quality assessment                                                                                         |              |                      |                      |                      |                           |                      | No. of participants                                                          |                                                                              | Effect                                                     |                                              | Certainty (GRADE) | Importance |
|------------------------------------------------------------------------------------------------------------|--------------|----------------------|----------------------|----------------------|---------------------------|----------------------|------------------------------------------------------------------------------|------------------------------------------------------------------------------|------------------------------------------------------------|----------------------------------------------|-------------------|------------|
| No. of studies                                                                                             | Study design | Risk of bias         | Inconsistency        | Indirectness         | Imprecision               | Other considerations | # Events/ Intervention                                                       | # Events/ Control                                                            | Relative (95% CI)                                          | Absolute (95% CI)                            |                   |            |
| Antenatal care visits: average number of visits<br>Studies: Mori, 2015 (Mongolia); Osaki, 2018 (Indonesia) |              |                      |                      |                      |                           |                      |                                                                              |                                                                              |                                                            |                                              |                   |            |
| 2                                                                                                          | cRCTs        | Serious <sup>1</sup> | Not serious          | Serious <sup>2</sup> | Not serious               | None                 | Mori (2015):<br>Mean 6.615<br>(± 1.525)<br>Osaki (2018):<br>Mean 6.3 (± 2.5) | Mori (2015):<br>Mean 6.407<br>(± 1.765)<br>Osaki (2018):<br>Mean 5.6 (± 3.1) | Mori (2015):<br>mean difference<br>0.208 (-0.710 to 1.125) | Not calculated                               | LOW               | Critical   |
| Antenatal care visits: six or more visits<br>Studies: Mori, 2015 (Mongolia); Osaki, 2018 (Indonesia)       |              |                      |                      |                      |                           |                      |                                                                              |                                                                              |                                                            |                                              |                   |            |
| 2                                                                                                          | cRCTs        | Serious <sup>1</sup> | Serious <sup>3</sup> | Serious <sup>2</sup> | None                      | None                 | 306/436                                                                      | 285/519                                                                      | OR 1.93<br>(1.48 to 2.53)                                  | 152 more per 1000 (from 94 more to 206 more) | VERY LOW          | Critical   |
| Antenatal care visits: four or more visits<br>Studies: Osaki, 2018 (Indonesia)                             |              |                      |                      |                      |                           |                      |                                                                              |                                                                              |                                                            |                                              |                   |            |
| 1                                                                                                          | cRCT         | Serious <sup>1</sup> | Not serious          | Not serious          | Not serious               | None                 | 133/183                                                                      | 185/271                                                                      | OR 1.25<br>(0.81 to 1.95)                                  | Not calculated                               | MODERATE          | Critical   |
| Care seeking for pregnancy complications<br>Studies: Osaki, 2018 (Indonesia)                               |              |                      |                      |                      |                           |                      |                                                                              |                                                                              |                                                            |                                              |                   |            |
| 1                                                                                                          | cRCT         | Serious <sup>1</sup> | Not serious          | Not serious          | Very serious <sup>4</sup> | None                 | 11/13                                                                        | 36/53                                                                        | OR 2.6<br>(0.52 to 13.04)                                  | Not calculated                               | VERY LOW          | Critical   |

| Maternal immunization: TT2                                     |      |                      |             |             |                           |      |         |         |                           |                |          |          |
|----------------------------------------------------------------|------|----------------------|-------------|-------------|---------------------------|------|---------|---------|---------------------------|----------------|----------|----------|
| Studies: Osaki, 2018 (Indonesia)                               |      |                      |             |             |                           |      |         |         |                           |                |          |          |
| 1                                                              | cRCT | Serious <sup>1</sup> | Not serious | Not serious | Not serious               | None | 139/183 | 162/271 | OR 1.98<br>(1.29 to 3.04) | Not calculated | MODERATE | Critical |
| Childbirth with a skilled birth attendant at a health facility |      |                      |             |             |                           |      |         |         |                           |                |          |          |
| Studies: Osaki, 2018 (Indonesia)                               |      |                      |             |             |                           |      |         |         |                           |                |          |          |
| 1                                                              | cRCT | Serious <sup>1</sup> | Not serious | Not serious | Serious <sup>5</sup>      | None | 79/183  | 106/271 | OR 1.14<br>(0.75 to 1.74) | Not calculated | LOW      | Critical |
| Care seeking for postpartum complications                      |      |                      |             |             |                           |      |         |         |                           |                |          |          |
| Studies: Osaki, 2018 (Indonesia)                               |      |                      |             |             |                           |      |         |         |                           |                |          |          |
| 1                                                              | cRCT | Serious <sup>1</sup> | Not serious | Not serious | Very serious <sup>6</sup> | None | 4/6     | 8/28    | OR 5.0<br>(0.76 to 32.93) | Not calculated | VERY LOW | Critical |

<sup>1</sup> Allocation concealment and attrition bias

<sup>2</sup> Differences in comparison groups (sporadic availability of HBRs vs delay of 7 months)

<sup>3</sup> Mori (2015) reports no effect on outcome; Osaki (2018) reports significant effect

<sup>4</sup> Very low number of events (<100) and wide confidence intervals

<sup>5</sup> Low number of events (<300)

<sup>6</sup> Low number of events (<300) and wide confidence intervals

## b. Maternal self-care practices

| Quality assessment                                      |              |                      |               |              |                           |                                                   | No. of participants    |                   | Effect                                 |                | Certainty (GRADE) | Importance |
|---------------------------------------------------------|--------------|----------------------|---------------|--------------|---------------------------|---------------------------------------------------|------------------------|-------------------|----------------------------------------|----------------|-------------------|------------|
| No. of studies                                          | Study design | Risk of bias         | Inconsistency | Indirectness | Imprecision               | Other considerations                              | # Events/ Intervention | # Events/ Control | Relative                               | Absolute       |                   |            |
| Healthy pregnancy behaviours: smoking during pregnancy  |              |                      |               |              |                           |                                                   |                        |                   |                                        |                |                   |            |
| Studies: Mori, 2015 (Mongolia)                          |              |                      |               |              |                           |                                                   |                        |                   |                                        |                |                   |            |
| 1                                                       | cRCT         | Serious <sup>1</sup> | Not serious   | Not serious  | Very serious <sup>2</sup> | 12 control participants received the intervention | 5/253                  | 7/247             | RR 1.01 <sup>3</sup><br>(0.9 to 1.04)  | Not calculated | VERY LOW          | Critical   |
| Healthy pregnancy behaviours: drinking during pregnancy |              |                      |               |              |                           |                                                   |                        |                   |                                        |                |                   |            |
| Studies: Mori, 2015 (Mongolia)                          |              |                      |               |              |                           |                                                   |                        |                   |                                        |                |                   |            |
| 1                                                       | cRCT         | Serious <sup>1</sup> | Not serious   | Not serious  | Very serious <sup>2</sup> | 12 control participants                           | 20/251                 | 35/248            | RR 1.07 <sup>4</sup><br>(0.97 to 1.18) | Not calculated | VERY LOW          | Critical   |

|  |  |  |  |  |  |                           |  |  |  |  |  |  |  |
|--|--|--|--|--|--|---------------------------|--|--|--|--|--|--|--|
|  |  |  |  |  |  | received the intervention |  |  |  |  |  |  |  |
|--|--|--|--|--|--|---------------------------|--|--|--|--|--|--|--|

Healthy household environment: smoking among family members  
Studies: Mori, 2015 (Mongolia)

|   |      |                      |             |             |                      |                                                   |         |         |                                       |                                            |     |          |
|---|------|----------------------|-------------|-------------|----------------------|---------------------------------------------------|---------|---------|---------------------------------------|--------------------------------------------|-----|----------|
| 1 | cRCT | Serious <sup>1</sup> | Not serious | Not serious | Serious <sup>5</sup> | 12 control participants received the intervention | 129/252 | 151/247 | RR 0.84 <sup>4</sup><br>(0.7 to 0.99) | 97 fewer per 1000<br>(from 6 to 177 fewer) | LOW | Critical |
|---|------|----------------------|-------------|-------------|----------------------|---------------------------------------------------|---------|---------|---------------------------------------|--------------------------------------------|-----|----------|

Improved communication within the household: husband's support (proxy)  
Studies: Osaki, 2018 (Indonesia)

|   |      |                      |             |                      |                      |      |         |         |                           |                                            |     |          |
|---|------|----------------------|-------------|----------------------|----------------------|------|---------|---------|---------------------------|--------------------------------------------|-----|----------|
| 1 | cRCT | Serious <sup>6</sup> | Not serious | Serious <sup>7</sup> | Serious <sup>5</sup> | None | 109/183 | 119/271 | OR 1.82<br>(1.20 to 2.76) | 157 more per 1000<br>(from 64 to 249 more) | LOW | Critical |
|---|------|----------------------|-------------|----------------------|----------------------|------|---------|---------|---------------------------|--------------------------------------------|-----|----------|

<sup>1</sup> Serious concerns regarding confounding

<sup>2</sup> Very low number of events (<100)

<sup>3</sup> In Mori (2015) 12 control participants received the intervention

<sup>4</sup> Risk Ratio

<sup>5</sup> Low number of events (<300)

<sup>6</sup> Allocation concealment and attrition bias in Osaki (2018)

<sup>7</sup> Proxy outcome (indirect evidence)

### c. Maternal mortality and morbidity

| Quality assessment                                     |              |                      |               |              |                           |                                                   | No. of participants |         | Effect                                 |                | Certainty (GRADE) | Importance |
|--------------------------------------------------------|--------------|----------------------|---------------|--------------|---------------------------|---------------------------------------------------|---------------------|---------|----------------------------------------|----------------|-------------------|------------|
| No. of studies                                         | Study design | Risk of bias         | Inconsistency | Indirectness | Imprecision               | Other considerations                              | Intervention        | Control | Relative                               | Absolute       |                   |            |
| Postnatal depression<br>Studies: Mori, 2015 (Mongolia) |              |                      |               |              |                           |                                                   |                     |         |                                        |                |                   |            |
| 1                                                      | cRCT         | Serious <sup>1</sup> | Not serious   | Not serious  | Very serious <sup>2</sup> | 12 control participants received the intervention | 15/253              | 11/248  | RR 0.99 <sup>3</sup><br>(0.94 to 1.04) | Not calculated | VERY LOW          | Important  |

<sup>1</sup> Serious concerns regarding confounding

<sup>2</sup> Very low number of events (<100)

<sup>3</sup> Risk Ratio

## 1.2 Newborn health

### a. Newborn care seeking

| Quality assessment                                                   |              |                      |               |              |                           |                      | No. of participants |         | Effect                    |                | Certainty (GRADE) | Importance |
|----------------------------------------------------------------------|--------------|----------------------|---------------|--------------|---------------------------|----------------------|---------------------|---------|---------------------------|----------------|-------------------|------------|
| No. of studies                                                       | Study design | Risk of bias         | Inconsistency | Indirectness | Imprecision               | Other considerations | Intervention        | Control | Relative                  | Absolute       |                   |            |
| Care seeking for newborn illness<br>Studies: Osaki, 2018 (Indonesia) |              |                      |               |              |                           |                      |                     |         |                           |                |                   |            |
| 1                                                                    | cRCT         | Serious <sup>1</sup> | Not serious   | Not serious  | Very serious <sup>2</sup> | None                 | 10/14               | 17/29   | OR 1.76<br>(0.45 to 6.98) | Not calculated | VERY LOW          | Critical   |

<sup>1</sup> Allocation concealment and attrition bias in Osaki (2018)

<sup>2</sup> Very low number of events (<100)

### b. Newborn care practices

| Quality assessment                                                                                         |              |                      |               |                      |                      |                                                   | No. of participants |         | Effect                                 |                                       | Certainty (GRADE) | Importance |
|------------------------------------------------------------------------------------------------------------|--------------|----------------------|---------------|----------------------|----------------------|---------------------------------------------------|---------------------|---------|----------------------------------------|---------------------------------------|-------------------|------------|
| No. of studies                                                                                             | Study design | Risk of bias         | Inconsistency | Indirectness         | Imprecision          | Other considerations                              | Intervention        | Control | Relative                               | Absolute                              |                   |            |
| Immediate breastfeeding<br>Studies: Mori, 2015 (Mongolia)                                                  |              |                      |               |                      |                      |                                                   |                     |         |                                        |                                       |                   |            |
| 1                                                                                                          | cRCT         | Serious <sup>1</sup> | Not serious   | Not serious          | Not serious          | 12 control participants received the intervention | 252/253             | 244/246 | RR 1.07 <sup>2</sup><br>(0.97 to 1.18) | Not calculated                        | MODERATE          | Critical   |
| Improved communication within the household: husband's support (proxy)<br>Studies: Osaki, 2018 (Indonesia) |              |                      |               |                      |                      |                                                   |                     |         |                                        |                                       |                   |            |
| 1                                                                                                          | cRCT         | Serious <sup>3</sup> | Not serious   | Serious <sup>4</sup> | Serious <sup>5</sup> | None                                              | 65/183              | 72/271  | OR 1.58<br>(1.02 to 2.46)              | 89 more per 1000 (from 3 to 176 more) | VERY LOW          | Important  |

<sup>1</sup> Serious concerns regarding confounding

<sup>2</sup> Risk Ratio

<sup>3</sup> Allocation concealment and attrition bias in Osaki (2018)

<sup>4</sup> Proxy outcome (indirect evidence)

<sup>5</sup> Low number of events (<300)

### c. Perinatal mortality and morbidity

| Quality assessment                                |              |                      |               |              |                           |                                                   | No. of participants    |                        | Effect                                        |                | Certainty (GRADE) | Importance |
|---------------------------------------------------|--------------|----------------------|---------------|--------------|---------------------------|---------------------------------------------------|------------------------|------------------------|-----------------------------------------------|----------------|-------------------|------------|
| No. of studies                                    | Study design | Risk of bias         | Inconsistency | Indirectness | Imprecision               | Other considerations                              | Intervention           | Control                | Relative                                      | Absolute       |                   |            |
| Neonatal deaths<br>Studies: Mori, 2015 (Mongolia) |              |                      |               |              |                           |                                                   |                        |                        |                                               |                |                   |            |
| 1                                                 | cRCT         | Serious <sup>1</sup> | Not serious   | Not serious  | Very serious <sup>2</sup> | 12 control participants received the intervention | 1/253                  | 2/248                  | RR 1.00 <sup>3</sup><br>(0.99 to 1.02)        | Not calculated | VERY LOW          | Important  |
| APGAR score<br>Studies: Mori, 2015 (Mongolia)     |              |                      |               |              |                           |                                                   |                        |                        |                                               |                |                   |            |
| 1                                                 | cRCT         | Serious <sup>1</sup> | Not serious   | Not serious  | Not serious               | 12 control participants received the intervention | Mean: 7.55<br>(± 0.89) | Mean: 7.34<br>(± 1.25) | Mean difference:<br>0.210<br>(0.212 to 0.632) | Not calculated | MODERATE          | Important  |

<sup>1</sup> Serious concerns regarding confounding

<sup>2</sup> Very low number of events (<100)

<sup>3</sup> Risk Ratio

## 1.3 Child health

### a. Vaccination use

| Quality assessment                                                |                                                |                           |               |                      |             |                      | No. of participants |         | Effect                    |                   | Certainty (GRADE) | Importance |
|-------------------------------------------------------------------|------------------------------------------------|---------------------------|---------------|----------------------|-------------|----------------------|---------------------|---------|---------------------------|-------------------|-------------------|------------|
| No. of studies                                                    | Study design                                   | Risk of bias              | Inconsistency | Indirectness         | Imprecision | Other considerations | Intervention        | Control | Relative (95% CI)         | Absolute (95% CI) |                   |            |
| DTP3 completion<br>Studies: Lakhani, 1984 (UK); Stille, 2001 (US) |                                                |                           |               |                      |             |                      |                     |         |                           |                   |                   |            |
| 2                                                                 | RCT (1)<br>Non-randomized controlled trial (1) | Very serious <sup>1</sup> | Not serious   | Serious <sup>2</sup> | Not serious | None                 | 126/313             | 136/301 | OR 0.82<br>(0.52 to 1.30) | Not calculated    | VERY LOW          | Critical   |

<sup>1</sup> Stille (2001) non-randomized design and selection bias

<sup>2</sup> Differences in DTP completion measurement and differences in intervention design

## b. Child care seeking

| Quality assessment                                                            |              |                      |               |                      |                           |                      | No. of participants                                                                                                                                                               |                                                                                                                                                                                   | Effect                                                                                                                                                                          |                                                                           | Certainty (GRADE) | Importance |
|-------------------------------------------------------------------------------|--------------|----------------------|---------------|----------------------|---------------------------|----------------------|-----------------------------------------------------------------------------------------------------------------------------------------------------------------------------------|-----------------------------------------------------------------------------------------------------------------------------------------------------------------------------------|---------------------------------------------------------------------------------------------------------------------------------------------------------------------------------|---------------------------------------------------------------------------|-------------------|------------|
| No. of studies                                                                | Study design | Risk of bias         | Inconsistency | Indirectness         | Imprecision               | Other considerations | Intervention                                                                                                                                                                      | Control                                                                                                                                                                           | Relative (95% CI)                                                                                                                                                               | Absolute (95% CI)                                                         |                   |            |
| Care seeking for childhood illness                                            |              |                      |               |                      |                           |                      |                                                                                                                                                                                   |                                                                                                                                                                                   |                                                                                                                                                                                 |                                                                           |                   |            |
| Studies: Osaki, 2018 (Indonesia)                                              |              |                      |               |                      |                           |                      |                                                                                                                                                                                   |                                                                                                                                                                                   |                                                                                                                                                                                 |                                                                           |                   |            |
| 1                                                                             | cRCT         | Serious <sup>1</sup> | Not serious   | Not serious          | Very serious <sup>2</sup> | None                 | Not reported                                                                                                                                                                      | Not reported                                                                                                                                                                      | Not reported                                                                                                                                                                    | "Care seeking from health personnel was similarly observed in both areas" | VERY LOW          | Critical   |
| Care seeking for childhood illness: frequency of contact with health services |              |                      |               |                      |                           |                      |                                                                                                                                                                                   |                                                                                                                                                                                   |                                                                                                                                                                                 |                                                                           |                   |            |
| Studies: Bjerkeli Grovdal, 2006 (Norway)                                      |              |                      |               |                      |                           |                      |                                                                                                                                                                                   |                                                                                                                                                                                   |                                                                                                                                                                                 |                                                                           |                   |            |
| 1                                                                             | RCT          | Serious <sup>3</sup> | Not serious   | Not serious          | Very serious <sup>4</sup> | None                 | Children with more encounters with healthcare services<br>Non-routine child health centre: 35/155<br>Doctor outside child health centre: 30/155<br>Specialist or hospital: 13/155 | Children with more encounters with healthcare services<br>Non-routine child health centre: 35/154<br>Doctor outside child health centre: 28/154<br>Specialist or hospital: 16/154 | Non-routine child health centre:<br>OR 0.99 (0.58 to 1.69)<br>Doctor outside child health centre:<br>OR 1.08 (0.61 to 1.91)<br>Specialist or hospital:<br>OR 1.25 (0.37 to 1.7) | Not calculated                                                            | VERY LOW          | Critical   |
| Care seeking for childhood illness: children with chronic disease             |              |                      |               |                      |                           |                      |                                                                                                                                                                                   |                                                                                                                                                                                   |                                                                                                                                                                                 |                                                                           |                   |            |
| Studies: Bjerkeli Grovdal, 2006 (Norway)                                      |              |                      |               |                      |                           |                      |                                                                                                                                                                                   |                                                                                                                                                                                   |                                                                                                                                                                                 |                                                                           |                   |            |
| 1                                                                             | RCT          | Serious <sup>3</sup> | Not serious   | Serious <sup>5</sup> | Very serious <sup>6</sup> | None                 | Not reported                                                                                                                                                                      | Not reported                                                                                                                                                                      | Not reported                                                                                                                                                                    | "17% more parents in                                                      | VERY LOW          | Critical   |

|  |  |  |  |  |  |  |  |  |  |  |                                                    |  |  |
|--|--|--|--|--|--|--|--|--|--|--|----------------------------------------------------|--|--|
|  |  |  |  |  |  |  |  |  |  |  | the control group visited the child health centre" |  |  |
|--|--|--|--|--|--|--|--|--|--|--|----------------------------------------------------|--|--|

<sup>1</sup> Allocation concealment and attrition bias

<sup>2</sup> Data not reported

<sup>3</sup> High risk for selection bias

<sup>4</sup> Unable to assess number of events as outcome data are ordinal

<sup>5</sup> Population is children with chronic illness for this outcome

<sup>6</sup> Unable to assess number of events as not reported

### c. Child care practices

| Quality assessment                                                                     |              |                      |               |              |                      |                                            | No. of participants |         | Effect                    |                                          | Certainty (GRADE) | Importance |
|----------------------------------------------------------------------------------------|--------------|----------------------|---------------|--------------|----------------------|--------------------------------------------|---------------------|---------|---------------------------|------------------------------------------|-------------------|------------|
| No. of studies                                                                         | Study design | Risk of bias         | Inconsistency | Indirectness | Imprecision          | Other considerations                       | Intervention        | Control | Relative                  | Absolute                                 |                   |            |
| Exclusive breastfeeding<br>Studies: Osaki, 2018 (Indonesia)                            |              |                      |               |              |                      |                                            |                     |         |                           |                                          |                   |            |
| 1                                                                                      | cRCT         | Serious <sup>1</sup> | Not serious   | Not serious  | Serious <sup>2</sup> | None                                       | 79/183              | 132/271 | OR 0.76<br>(0.51 to 1.14) | Not calculated                           | LOW               | Critical   |
| Complementary feeding<br>Studies: Osaki, 2018 (Indonesia)                              |              |                      |               |              |                      |                                            |                     |         |                           |                                          |                   |            |
| 1                                                                                      | cRCT         | Serious <sup>1</sup> | Not serious   | Not serious  | Serious <sup>2</sup> | Large effect noted in a positive direction | 113/183             | 74/271  | OR 4.35<br>(2.85 to 6.65) | 344 more per 1000 (from 256 to 433 more) | MODERATE          | Critical   |
| Continued breastfeeding<br>Studies: Osaki, 2018 (Indonesia)                            |              |                      |               |              |                      |                                            |                     |         |                           |                                          |                   |            |
| 1                                                                                      | cRCT         | Serious <sup>1</sup> | Not serious   | Not serious  | Not serious          | None                                       | 167/183             | 224/271 | OR 2.31<br>(1.22 to 4.39) | 86 more per 1000 (from 25 to 146 more)   | MODERATE          | Critical   |
| Infant and child illness management: Vitamin A use<br>Studies: Osaki, 2018 (Indonesia) |              |                      |               |              |                      |                                            |                     |         |                           |                                          |                   |            |
| 1                                                                                      | cRCT         | Serious <sup>1</sup> | Not serious   | Not serious  | Not serious          | None                                       | 160/183             | 205/271 | OR 2.00                   | 118 more per 1000 (from 47               | MODERATE          | Critical   |

|                                                                                                            |      |                      |             |                      |                           |                                            |        |        |                           |                                              |          |           |
|------------------------------------------------------------------------------------------------------------|------|----------------------|-------------|----------------------|---------------------------|--------------------------------------------|--------|--------|---------------------------|----------------------------------------------|----------|-----------|
|                                                                                                            |      |                      |             |                      |                           |                                            |        |        | (1.16 to 3.47)            | to 188 more)                                 |          |           |
| Infant and child illness management: home care cough<br>Studies: Osaki, 2018 (Indonesia)                   |      |                      |             |                      |                           |                                            |        |        |                           |                                              |          |           |
| 1                                                                                                          | cRCT | Serious <sup>1</sup> | Not serious | Not serious          | Very serious <sup>3</sup> | Large effect noted in a positive direction | 36/45  | 32/60  | OR 3.50<br>(1.44 to 8.52) | 267 more per 1000 (from 89 more to 374 more) | LOW      | Critical  |
| Infant and child illness management: home care diarrhoea<br>Studies: Osaki, 2018 (Indonesia)               |      |                      |             |                      |                           |                                            |        |        |                           |                                              |          |           |
| 1                                                                                                          | cRCT | Serious <sup>1</sup> | Not serious | Serious <sup>4</sup> | Very serious <sup>3</sup> | None                                       | 20/24  | 25/27  | Not reported              | Not calculated                               | VERY LOW | Critical  |
| Improved communication within the household: husband's support (proxy)<br>Studies: Osaki, 2015 (Indonesia) |      |                      |             |                      |                           |                                            |        |        |                           |                                              |          |           |
| 1                                                                                                          | cRCT | Serious <sup>1</sup> | Not serious | Serious <sup>5</sup> | Serious <sup>2</sup>      | None                                       | 78/183 | 86/271 | OR 1.62<br>(1.06 to 2.48) | 109 more per 1000 (from 18 to 200 more)      | VERY LOW | Important |

<sup>1</sup> Allocation concealment and attrition bias in Osaki (2018)

<sup>2</sup> Low number of events (<300)

<sup>3</sup> Very low number of events (<100)

<sup>4</sup> Diarrhoea only one of many possibly illnesses

<sup>5</sup> Proxy outcome (indirect evidence)



#### d. Child mortality and morbidity

| Quality assessment                                             |              |                           |               |              |                           |                      | No. of participants |         | Effect                    |                                              | Certainty (GRADE) | Importance |
|----------------------------------------------------------------|--------------|---------------------------|---------------|--------------|---------------------------|----------------------|---------------------|---------|---------------------------|----------------------------------------------|-------------------|------------|
| No. of studies                                                 | Study design | Risk of bias              | Inconsistency | Indirectness | Imprecision               | Other considerations | Intervention        | Control | Relative                  | Absolute                                     |                   |            |
| Underweight children<br>Studies: Osaki, 2018 (Indonesia)       |              |                           |               |              |                           |                      |                     |         |                           |                                              |                   |            |
| 1                                                              | cRCT         | Serious <sup>1</sup>      | Not serious   | Not serious  | Very serious <sup>2</sup> | None                 | 7/135               | 35/250  | OR 0.33<br>(0.12 to 0.94) | 88 fewer per 1000<br>(from 31 to 145 fewer)  | VERY LOW          | Important  |
| Stunted growth<br>Studies: Osaki, 2018 (Indonesia)             |              |                           |               |              |                           |                      |                     |         |                           |                                              |                   |            |
| 1                                                              | cRCT         | Serious <sup>1</sup>      | Not serious   | Not serious  | Serious <sup>3</sup>      | None                 | 35/133              | 100/248 | OR 0.53<br>(0.30 to 0.92) | 140 fewer per 1000<br>(from 44 to 237 fewer) | LOW               | Important  |
| Wasting<br>Studies: Osaki, 2018 (Indonesia)                    |              |                           |               |              |                           |                      |                     |         |                           |                                              |                   |            |
| 1                                                              | cRCT         | Serious <sup>1</sup>      | Not serious   | Not serious  | Very serious <sup>2</sup> | None                 | 10/133              | 30/248  | OR 0.59<br>(0.24 to 1.47) | Not calculated                               | VERY LOW          | Important  |
| Risk of cognitive delay<br>Studies: Dagvadorj, 2017 (Mongolia) |              |                           |               |              |                           |                      |                     |         |                           |                                              |                   |            |
| 1                                                              | cRCT         | Very serious <sup>4</sup> | Not serious   | Not serious  | Very serious <sup>2</sup> | None                 | 17/214              | 24/172  | OR 0.32<br>(0.14 to 0.73) | 90 fewer per 1000<br>(from 34 to 117 fewer)  | VERY LOW          | Important  |

<sup>1</sup> Allocation concealment and attrition bias

<sup>2</sup> Very low number of events (<100)

<sup>3</sup> Low number of events (<300)

<sup>4</sup> High risk for performance, detection and attrition bias; participants were not blinded to intervention

## 1.4 Care seeking across the MNCH continuum

| Quality assessment                                                                                                    |              |                      |               |              |                           |                                                              | No. of participants |         | Effect                     |                                            | Certainty (GRADE) | Importance |
|-----------------------------------------------------------------------------------------------------------------------|--------------|----------------------|---------------|--------------|---------------------------|--------------------------------------------------------------|---------------------|---------|----------------------------|--------------------------------------------|-------------------|------------|
| No. of studies                                                                                                        | Study design | Risk of bias         | Inconsistency | Indirectness | Imprecision               | Other considerations                                         | Intervention        | Control | Relative                   | Absolute                                   |                   |            |
| Maternal: TT2, ANC4, SBA<br>Studies: Osaki, 2018 (Indonesia)                                                          |              |                      |               |              |                           |                                                              |                     |         |                            |                                            |                   |            |
| 1                                                                                                                     | cRCT         | Serious <sup>1</sup> | Not serious   | Not serious  | Serious <sup>2</sup>      | None                                                         | 53/183              | 50/271  | OR 1.46<br>(0.89 to 2.40)  | Not calculated                             | LOW               | Important  |
| Maternal and newborn: TT2, ANC4, SBA, VitA, ExBF<br>Studies: Osaki, 2018 (Indonesia)                                  |              |                      |               |              |                           |                                                              |                     |         |                            |                                            |                   |            |
| 1                                                                                                                     | cRCT         | Serious <sup>1</sup> | Not serious   | Not serious  | Very serious <sup>3</sup> | None                                                         | 31/183              | 22/271  | OR 2.38<br>(1.22 to 4.64)  | 88 more per 1000<br>(from 24 to 151 more)  | VERY LOW          | Important  |
| Maternal, newborn and child: TT2, ANC4, SBA, VitA, ExBF, started CF in 6-9 months<br>Studies: Osaki, 2018 (Indonesia) |              |                      |               |              |                           |                                                              |                     |         |                            |                                            |                   |            |
| 1                                                                                                                     | cRCT         | Serious <sup>1</sup> | Not serious   | Not serious  | Very serious <sup>3</sup> | Large effect noted in a positive direction, however wide CIs | 22/183              | 5/271   | OR 7.13<br>(2.43 to 20.90) | 100 more per 1000<br>(from 25 to 264 more) | LOW               | Important  |

<sup>1</sup> Allocation concealment and attrition bias

<sup>2</sup> Low number of events (<300)

<sup>3</sup> Very low number of events (<100) and wide confidence intervals

2. For women during pregnancy and after birth, and for newborns, children and caregivers (P), does use of any home-based records (I), compared with inconsistent use (low use) of any home-based records (C), improve maternal, newborn and child health outcomes (O)?

(No studies)

3. For women during pregnancy and after birth, and for newborns, children and caregivers (P), does use of different types of home-based records (I) and (C), improve maternal, newborn and child health outcomes (O)?

### 3.1 Maternal health

#### a. Maternal care seeking

| Quality assessment                                                                                          |                                 |                      |               |              |                      |                                                                                                 | No. of participants                                                                    |                                                                                        | Effect                                                                                                                           |                   | Certainty (GRADE) | Importance |
|-------------------------------------------------------------------------------------------------------------|---------------------------------|----------------------|---------------|--------------|----------------------|-------------------------------------------------------------------------------------------------|----------------------------------------------------------------------------------------|----------------------------------------------------------------------------------------|----------------------------------------------------------------------------------------------------------------------------------|-------------------|-------------------|------------|
| No. of studies                                                                                              | Study design                    | Risk of bias         | Inconsistency | Indirectness | Imprecision          | Other considerations                                                                            | Intervention                                                                           | Control                                                                                | Relative (95% CI)                                                                                                                | Absolute (95% CI) |                   |            |
| Antenatal care visits: % of women attending four or more ANC visits<br>Studies: Yanagisawa, 2015 (Cambodia) |                                 |                      |               |              |                      |                                                                                                 |                                                                                        |                                                                                        |                                                                                                                                  |                   |                   |            |
| 1                                                                                                           | Non-randomized controlled trial | Serious <sup>1</sup> | Not serious   | Not serious  | Not serious          | None                                                                                            | Pre-intervention survey: 33.1%<br>Post-intervention survey: 45.3%<br>Difference: 12.3% | Pre-intervention survey: 29.4%<br>Post-intervention survey: 39.7%<br>Difference: 10.3% | Difference-in-Differences: 1.9%<br>Adjusted OR (intervention): 1.55 (1.09 to 2.20)<br>Adjusted OR (control): 1.28 (0.90 to 1.81) | Not calculated    | VERY LOW          | Critical   |
| Missed antenatal care appointments:<br>Studies: Lovell, 1987 (UK)                                           |                                 |                      |               |              |                      |                                                                                                 |                                                                                        |                                                                                        |                                                                                                                                  |                   |                   |            |
| 1                                                                                                           | RCT                             | Serious <sup>2</sup> | Not serious   | Not serious  | Serious <sup>3</sup> | "Mothers in the control group also had access to their notes while waiting in antenatal clinic" | 73/98                                                                                  | 65/105                                                                                 | OR 1.8 (0.99 to 3.28)                                                                                                            | Not calculated    | LOW               | Critical   |

| Childbirth with a skilled birth attendant<br>Studies: Yanagisawa, 2015 (Cambodia) |                                 |                      |             |             |             |      |                                                                                        |                                                                                        |                                                                                                                                    |                |          |          |
|-----------------------------------------------------------------------------------|---------------------------------|----------------------|-------------|-------------|-------------|------|----------------------------------------------------------------------------------------|----------------------------------------------------------------------------------------|------------------------------------------------------------------------------------------------------------------------------------|----------------|----------|----------|
| 1                                                                                 | Non-randomized controlled trial | Serious <sup>1</sup> | Not serious | Not serious | Not serious | None | Pre-intervention survey: 53.8%<br>Post-intervention survey: 77.2%<br>Difference: 23.4% | Pre-intervention survey: 56.6%<br>Post-intervention survey: 67.8%<br>Difference: 11.2% | Difference-in-differences: 12.2%<br>Adjusted OR (intervention): 2.613 (1.81 to 3.78)<br>Adjusted OR (control): 1.09 (0.76 to 1.56) | Not calculated | VERY LOW | Critical |

<sup>1</sup> High risk for selection, performance and detection bias

<sup>2</sup> High risk for selection, performance, detection and attrition bias

<sup>3</sup> Less than 300 events

## b. Maternal care practices

| Quality assessment                                                                          |              |                      |               |              |                           |                                                                                                 | No. of participants                 |                                       | Effect                                                                |                                                                                        | Certainty (GRADE) | Importance |
|---------------------------------------------------------------------------------------------|--------------|----------------------|---------------|--------------|---------------------------|-------------------------------------------------------------------------------------------------|-------------------------------------|---------------------------------------|-----------------------------------------------------------------------|----------------------------------------------------------------------------------------|-------------------|------------|
| No. of studies                                                                              | Study design | Risk of bias         | Inconsistency | Indirectness | Imprecision               | Other considerations                                                                            | Intervention                        | Control                               | Relative (95% CI)                                                     | Absolute (95% CI)                                                                      |                   |            |
| Healthy pregnancy behaviours: smoking at 8-16 and 32-34 weeks<br>Studies: Lovell, 1987 (UK) |              |                      |               |              |                           |                                                                                                 |                                     |                                       |                                                                       |                                                                                        |                   |            |
| 1                                                                                           | RCT          | Serious <sup>1</sup> | Not serious   | Not serious  | Serious <sup>2</sup>      | "Mothers in the control group also had access to their notes while waiting in antenatal clinic" | 8-16 wks: 74/98<br>32-34 wks: 73/98 | 8-16 wks: 79/105<br>32-34 wks: 77/105 | 8-16 wks: OR 1.01 (0.54 to 1.92)<br>32-34 wks: OR 1.06 (0.57 to 1.99) | Not calculated                                                                         | LOW               | Critical   |
| Healthy pregnancy behaviours: number of cigarettes smoked<br>Studies: Elbourne, 1987 (UK)   |              |                      |               |              |                           |                                                                                                 |                                     |                                       |                                                                       |                                                                                        |                   |            |
| 1                                                                                           | RCT          | Serious <sup>1</sup> | Not serious   | Not serious  | Very serious <sup>3</sup> | None                                                                                            | Not reported                        | Not reported                          | Not reported                                                          | "Clinical outcomes and women's health-related behaviour did not exhibit statistically" | VERY LOW          | Critical   |

|                                                                                              |     |                      |             |             |                      |                                                                                               |                                           |                                             |                                                        |                                                                                                                                                                 |     |          |
|----------------------------------------------------------------------------------------------|-----|----------------------|-------------|-------------|----------------------|-----------------------------------------------------------------------------------------------|-------------------------------------------|---------------------------------------------|--------------------------------------------------------|-----------------------------------------------------------------------------------------------------------------------------------------------------------------|-----|----------|
|                                                                                              |     |                      |             |             |                      |                                                                                               |                                           |                                             |                                                        | significant differences either between the two groups overall, or in terms of 'within-person' changes over the time period in the number of cigarettes smoked." |     |          |
| Healthy pregnancy behaviours: drinking at 8-16 and 32-34 weeks<br>Studies: Lovell, 1987 (UK) |     |                      |             |             |                      |                                                                                               |                                           |                                             |                                                        |                                                                                                                                                                 |     |          |
| 1                                                                                            | RCT | Serious <sup>1</sup> | Not serious | Not serious | Serious <sup>4</sup> | Mothers in the control group also had access to their notes while waiting in antenatal clinic | 8-16 wks:<br>65/98<br>32-34 wks:<br>59/98 | 8-16 wks:<br>77/105<br>32-34 wks:<br>72/105 | OR 0.72<br>(0.39 to 1.31)<br>OR 0.69<br>(0.39 to 1.24) | Not calculated                                                                                                                                                  | LOW | Critical |

<sup>1</sup> High risk for selection, concealment, detection and attrition bias

<sup>2</sup> Less than 300 events

<sup>3</sup> No data reported

<sup>4</sup> Less than 300 events

### c. Maternal mortality and morbidity

| Quality assessment                                            |              |                      |               |                      |                      |                      | No. of participants |         | Effect                   |                   | Certainty (GRADE) | Importance |
|---------------------------------------------------------------|--------------|----------------------|---------------|----------------------|----------------------|----------------------|---------------------|---------|--------------------------|-------------------|-------------------|------------|
| No. of studies                                                | Study design | Risk of bias         | Inconsistency | Indirectness         | Imprecision          | Other considerations | Intervention        | Control | Relative (95% CI)        | Absolute (95% CI) |                   |            |
| Clinical outcomes of the mother<br>Studies: Lovell, 1987 (UK) |              |                      |               |                      |                      |                      |                     |         |                          |                   |                   |            |
| 1                                                             | RCT          | Serious <sup>1</sup> | Not serious   | Serious <sup>2</sup> | Serious <sup>3</sup> | None                 | 55/104              | 69/108  | OR 0.63<br>(0.37 to 1.1) | Not calculated    | VERY LOW          | Important  |

<sup>1</sup> High risk for selection, performance, detection and attrition bias

<sup>2</sup> Population comprised of a higher proportion of one-parent families, high unemployment rate and a quarter of sample included West Indian and other groups disproportionately affected by social-deprivation

<sup>3</sup> Small sample size (less than 300 events)

## 3.2 Newborn health

### a. Newborn care practices

| Quality assessment                                                                                                         |                                 |                      |               |                      |                      |                      | No. of participants                                                                   |                                                                                      | Effect                                             |                | Certainty (GRADE) | Importance |
|----------------------------------------------------------------------------------------------------------------------------|---------------------------------|----------------------|---------------|----------------------|----------------------|----------------------|---------------------------------------------------------------------------------------|--------------------------------------------------------------------------------------|----------------------------------------------------|----------------|-------------------|------------|
| No. of studies                                                                                                             | Study design                    | Risk of bias         | Inconsistency | Indirectness         | Imprecision          | Other considerations | Intervention                                                                          | Control                                                                              | Relative                                           | Absolute       |                   |            |
| Early breastfeeding: Percentage of participants that initiated early breastfeeding<br>Studies: Yanagisawa, 2015 (Cambodia) |                                 |                      |               |                      |                      |                      |                                                                                       |                                                                                      |                                                    |                |                   |            |
| 1                                                                                                                          | Non-randomized controlled trial | Serious <sup>1</sup> | Not serious   | Not serious          | Serious <sup>2</sup> | None                 | Pre-intervention survey: 23.8%<br>Post-intervention survey: 40.0%<br>Difference:16.2% | Pre-intervention survey: 30.0%<br>Post-intervention survey: 40.0%<br>Difference: 10% | Difference-in-differences: 6.2%<br>OR not reported | Not calculated | VERY LOW          | Critical   |
| Immediate breastfeeding<br>Studies: Lovell, 1987 (UK)                                                                      |                                 |                      |               |                      |                      |                      |                                                                                       |                                                                                      |                                                    |                |                   |            |
| 1                                                                                                                          | Non-randomized controlled trial | Serious <sup>1</sup> | Not serious   | Serious <sup>3</sup> | Serious <sup>4</sup> | None                 | 77/98                                                                                 | 81/105                                                                               | OR 1.09<br>(0.56 to 2.11)                          | Not calculated | VERY LOW          | Critical   |

<sup>1</sup> High risk for selection, performance, detection and attrition bias

<sup>2</sup> Sample size and event numbers not available

<sup>3</sup> Population comprised of a higher proportion of one-parent families, high unemployment rate and a quarter of sample included West Indian and other groups disproportionately affected by social-deprivation

<sup>4</sup> Small sample sizes (less than 300 events)

### b. Improved communication within the household

| Quality assessment                                                                                   |              |                      |               |                      |                           |                      | No. of participants |              | Effect       |                | Certainty (GRADE) | Importance |
|------------------------------------------------------------------------------------------------------|--------------|----------------------|---------------|----------------------|---------------------------|----------------------|---------------------|--------------|--------------|----------------|-------------------|------------|
| No. of studies                                                                                       | Study design | Risk of bias         | Inconsistency | Indirectness         | Imprecision               | Other considerations | Intervention        | Control      | Relative     | Absolute       |                   |            |
| Improved communication within the household: husband support (proxy)<br>Studies: Elbourne, 1987 (UK) |              |                      |               |                      |                           |                      |                     |              |              |                |                   |            |
| 1                                                                                                    | RCT          | Serious <sup>1</sup> | Not serious   | Serious <sup>2</sup> | Very serious <sup>3</sup> | None                 | Not reported        | Not reported | Not reported | Not calculated | VERY LOW          | Important  |

<sup>1</sup> High risk for selection, performance, detection and attrition bias

<sup>2</sup> Proxy outcome (indirect evidence)

<sup>3</sup> Unable to assess as number of events not reported

### c. Perinatal mortality and morbidity

| Quality assessment                                                                                        |              |                      |               |                      |                           |                      | No. of participants                                                                                            |                                                                                                                | Effect                    |                | Certainty (GRADE) | Importance |
|-----------------------------------------------------------------------------------------------------------|--------------|----------------------|---------------|----------------------|---------------------------|----------------------|----------------------------------------------------------------------------------------------------------------|----------------------------------------------------------------------------------------------------------------|---------------------------|----------------|-------------------|------------|
| No. of studies                                                                                            | Study design | Risk of bias         | Inconsistency | Indirectness         | Imprecision               | Other considerations | Intervention                                                                                                   | Control                                                                                                        | Relative                  | Absolute       |                   |            |
| Neonatal deaths or stillbirths<br>Studies: Lovell, 1987 (UK)                                              |              |                      |               |                      |                           |                      |                                                                                                                |                                                                                                                |                           |                |                   |            |
| 1                                                                                                         | RCT          | Serious <sup>1</sup> | Not serious   | Serious <sup>2</sup> | Very serious <sup>3</sup> | None                 | 2/104                                                                                                          | 2/108                                                                                                          | OR 1.04<br>(0.1 to 7.52)  | Not calculated | VERY LOW          | Important  |
| Newborn outcomes (complications in the baby and stillborn or newborn death)<br>Studies: Lovell, 1987 (UK) |              |                      |               |                      |                           |                      |                                                                                                                |                                                                                                                |                           |                |                   |            |
| 1                                                                                                         | RCT          | Serious <sup>1</sup> | Not serious   | Serious <sup>2</sup> | Very serious <sup>4</sup> | None                 | Major antenatal complication, complications with the baby, miscarriage, stillborn or neonatal death:<br>49/104 | Major antenatal complication, complications with the baby, miscarriage, stillborn or neonatal death:<br>39/108 | OR 1.58<br>(0.91 to 2.73) | Not calculated | VERY LOW          | Important  |

<sup>1</sup> High risk for selection, performance, detection and attrition bias

<sup>2</sup> Population comprised of a higher proportion of one-parent families, high unemployment rate and a quarter of sample included West Indian and other groups disproportionately affected by social-deprivation

<sup>3</sup> Wide confidence interval and small number of events

<sup>4</sup> Less than 100 events

## 3.3 Child health

### a. Vaccination uptake

| Quality assessment                                                         |              |              |               |              |             |                      | No. of participants |         | Effect   |          | Certainty (GRADE) | Importance |
|----------------------------------------------------------------------------|--------------|--------------|---------------|--------------|-------------|----------------------|---------------------|---------|----------|----------|-------------------|------------|
| No. of studies                                                             | Study design | Risk of bias | Inconsistency | Indirectness | Imprecision | Other considerations | Intervention        | Control | Relative | Absolute |                   |            |
| DTP3 completion<br>Studies: Usman, 2009 (Pakistan); Usman, 2011 (Pakistan) |              |              |               |              |             |                      |                     |         |          |          |                   |            |

|   |      |             |                      |             |             |      |         |         |                           |                                               |          |          |
|---|------|-------------|----------------------|-------------|-------------|------|---------|---------|---------------------------|-----------------------------------------------|----------|----------|
| 2 | RCTs | Not serious | Serious <sup>1</sup> | Not serious | Not serious | None | 511/753 | 354/753 | OR 2.39<br>(1.45 to 3.92) | 209 more per<br>1000 (from 93<br>to 307 more) | MODERATE | CRITICAL |
|---|------|-------------|----------------------|-------------|-------------|------|---------|---------|---------------------------|-----------------------------------------------|----------|----------|

<sup>1</sup>I<sup>2</sup> value of 82% suggests high heterogeneity between studies

#### 4. For women during pregnancy and after birth, and for caregivers (P), does any use of home-based records (I), compared with no use of any home-based records (C), improve health service outcomes (O)?

##### 4.1 Quality of care

##### a. Communication between women/caregivers and health providers

| Quality assessment                                                                                        |              |                           |               |                        |                           |                      | No. of participants                                                                                                                             |                                                                                                                                  | Effect                                                                                            |                                                                                   | Certainty (GRADE) | Importance |
|-----------------------------------------------------------------------------------------------------------|--------------|---------------------------|---------------|------------------------|---------------------------|----------------------|-------------------------------------------------------------------------------------------------------------------------------------------------|----------------------------------------------------------------------------------------------------------------------------------|---------------------------------------------------------------------------------------------------|-----------------------------------------------------------------------------------|-------------------|------------|
| No. of studies                                                                                            | Study design | Risk of bias              | Inconsistency | Indirectness           | Imprecision               | Other considerations | Intervention                                                                                                                                    | Control                                                                                                                          | Relative (95% CI)                                                                                 | Absolute (95% CI)                                                                 |                   |            |
| Communication: difficulty talking to health personnel (proxy)<br>Studies: Bjerkeli Grovdal, 2006 (Norway) |              |                           |               |                        |                           |                      |                                                                                                                                                 |                                                                                                                                  |                                                                                                   |                                                                                   |                   |            |
| 1                                                                                                         | RCT          | Serious <sup>1</sup>      | Not serious   | Serious <sup>2</sup>   | Very serious <sup>3</sup> | None                 | Parents with more difficulty talking to health personnel:<br>Nurse 8/119<br>Doctor 19/118<br>Other doctors 16/89<br>Other health personnel 1/24 | Parents with more difficulty talking to health personnel:<br>Nurse 11/115<br>Doctor 17/122<br>Other doctors 12/104<br>Other 6/47 | Ordinal outcome measure:<br>Nurse p=0.86<br>Doctor p=0.78<br>Other doctors p=0.39<br>Other p=0.60 | Not calculated                                                                    | VERY LOW          | Important  |
| Communication: influence on communication (proxy)<br>Studies: Moore, 2000 (UK)                            |              |                           |               |                        |                           |                      |                                                                                                                                                 |                                                                                                                                  |                                                                                                   |                                                                                   |                   |            |
| 1                                                                                                         | RCT          | Very serious <sup>4</sup> | Not serious   | Serious <sup>2,5</sup> | Very serious <sup>6</sup> | None                 | Not reported                                                                                                                                    | Not reported                                                                                                                     | Not reported                                                                                      | "With one exception, there was no indication of a change [in communication] after | VERY LOW          | Important  |



|  |  |  |  |  |  |  |  |  |  |                   |  |  |
|--|--|--|--|--|--|--|--|--|--|-------------------|--|--|
|  |  |  |  |  |  |  |  |  |  | using the record" |  |  |
|--|--|--|--|--|--|--|--|--|--|-------------------|--|--|

Communication: received explanation from health personnel (proxy)  
 Studies: Osaki, 2018 (Indonesia)

|   |      |                      |             |                      |                      |                              |                                    |                                   |                                  |                                                                                                                                                                                    |          |           |
|---|------|----------------------|-------------|----------------------|----------------------|------------------------------|------------------------------------|-----------------------------------|----------------------------------|------------------------------------------------------------------------------------------------------------------------------------------------------------------------------------|----------|-----------|
| 1 | cRCT | Serious <sup>6</sup> | Not serious | Serious <sup>2</sup> | Serious <sup>7</sup> | Serious concern <sup>8</sup> | Improvement from baseline: 131/183 | Improvement from baseline: 31/271 | Difference in differences: 60.1% | There was a 60.1% higher increase in the people who had ever received explanation in the intervention arm compared to the control. No statistics reported comparing the two groups | VERY LOW | Important |
|---|------|----------------------|-------------|----------------------|----------------------|------------------------------|------------------------------------|-----------------------------------|----------------------------------|------------------------------------------------------------------------------------------------------------------------------------------------------------------------------------|----------|-----------|

<sup>1</sup> High risk for section bias  
<sup>2</sup> Proxy outcome (indirect evidence)  
<sup>3</sup> Unable to assess number of events as outcome data are ordinal  
<sup>4</sup> High risk for selection, attrition and other bias  
<sup>5</sup> Population is children with disabilities  
<sup>6</sup> Number of cases not reported  
<sup>6</sup> Allocation concealment and attrition bias in Osaki (2018)  
<sup>7</sup> Low number of events (<300)  
<sup>8</sup> Comparison group had higher values at baseline

## b. Satisfaction with services

| Quality assessment                             |              |                      |               |                      |                           |                      | No. of participants |              | Effect            |                                                                                                                                       | Certainty (GRADE) | Importance |
|------------------------------------------------|--------------|----------------------|---------------|----------------------|---------------------------|----------------------|---------------------|--------------|-------------------|---------------------------------------------------------------------------------------------------------------------------------------|-------------------|------------|
| No. of studies                                 | Study design | Risk of bias         | Inconsistency | Indirectness         | Imprecision               | Other considerations | Intervention        | Control      | Relative (95% CI) | Absolute (95% CI)                                                                                                                     |                   |            |
| Satisfaction with information provided (proxy) |              |                      |               |                      |                           |                      |                     |              |                   |                                                                                                                                       |                   |            |
| Studies: Bjerkeli Grovdal, 2006 (Norway)       |              |                      |               |                      |                           |                      |                     |              |                   |                                                                                                                                       |                   |            |
| 1                                              | RCT          | Serious <sup>1</sup> | Not serious   | Serious <sup>2</sup> | Very serious <sup>3</sup> | None                 | Not reported        | Not reported | Not reported      | “Parental satisfaction with information provided about their child’s health from different professionals was the same in both groups” | VERY LOW          | Important  |

<sup>1</sup> High risk for selection bias

<sup>2</sup> Proxy outcome (indirect evidence)

<sup>3</sup> Number of cases not reported

## c. Continuity of care

| Quality assessment                                                                 |              |                      |               |              |                      |                              | No. of participants               |                                   | Effect                        |                   | Certainty (GRADE) | Importance |
|------------------------------------------------------------------------------------|--------------|----------------------|---------------|--------------|----------------------|------------------------------|-----------------------------------|-----------------------------------|-------------------------------|-------------------|-------------------|------------|
| No. of studies                                                                     | Study design | Risk of bias         | Inconsistency | Indirectness | Imprecision          | Other considerations         | Intervention                      | Control                           | Relative (95% CI)             | Absolute (95% CI) |                   |            |
| Continuity of care after a two-year follow-up: brought to more than two facilities |              |                      |               |              |                      |                              |                                   |                                   |                               |                   |                   |            |
| Studies: Osaki, 2018 (Indonesia)                                                   |              |                      |               |              |                      |                              |                                   |                                   |                               |                   |                   |            |
| 1                                                                                  | cRCT         | Serious <sup>1</sup> | Not serious   | Not serious  | Serious <sup>2</sup> | Serious concern <sup>3</sup> | Improvement from baseline: 94/183 | Improvement from baseline: 17/271 | Difference in differences 45% | Not calculated    | VERY LOW          | Important  |
| Continuity of care after a two-year follow-up: brought to more than two occasions  |              |                      |               |              |                      |                              |                                   |                                   |                               |                   |                   |            |
| Studies: Osaki, 2018 (Indonesia)                                                   |              |                      |               |              |                      |                              |                                   |                                   |                               |                   |                   |            |
| 1                                                                                  | cRCT         | Serious <sup>1</sup> | Not serious   | Not serious  | Serious <sup>2</sup> | Serious                      | Improvement                       | Improvement                       | Difference in                 | Not               | VERY LOW          | Important  |

|                                                                                                                         |      |                      |             |             |                      |                              |                                      |                                      |                                    |                |          |           |
|-------------------------------------------------------------------------------------------------------------------------|------|----------------------|-------------|-------------|----------------------|------------------------------|--------------------------------------|--------------------------------------|------------------------------------|----------------|----------|-----------|
|                                                                                                                         |      |                      |             |             |                      | concern <sup>3</sup>         | from baseline:<br>95/183             | from baseline:<br>36/271             | differences<br>38.6%               | calculated     |          |           |
| Continuity of care after a two-year follow-up: filled in by more than two personnel<br>Studies: Osaki, 2018 (Indonesia) |      |                      |             |             |                      |                              |                                      |                                      |                                    |                |          |           |
| 1                                                                                                                       | cRCT | Serious <sup>1</sup> | Not serious | Not serious | Serious <sup>2</sup> | Serious concern <sup>3</sup> | Improvement from baseline:<br>76/183 | Improvement from baseline:<br>24/271 | Difference in differences<br>33.7% | Not calculated | VERY LOW | Important |

<sup>1</sup> Allocation concealment and attrition bias

<sup>2</sup> Low number of events (<300)

<sup>3</sup> Comparison group had higher values at baseline

#### d. Identification of pregnancy complications

| Quality assessment                                                          |              |                      |               |              |                           |                                                   | No. of participants |         | Effect                    |                                        | Certainty (GRADE) | Importance |
|-----------------------------------------------------------------------------|--------------|----------------------|---------------|--------------|---------------------------|---------------------------------------------------|---------------------|---------|---------------------------|----------------------------------------|-------------------|------------|
| No. of studies                                                              | Study design | Risk of bias         | Inconsistency | Indirectness | Imprecision               | Other considerations                              | Intervention        | Control | Relative (95% CI)         | Absolute (95% CI)                      |                   |            |
| Identification of pregnancy complications<br>Studies: Mori, 2015 (Mongolia) |              |                      |               |              |                           |                                                   |                     |         |                           |                                        |                   |            |
| 1                                                                           | cRCT         | Serious <sup>1</sup> | Not serious   | Not serious  | Very serious <sup>2</sup> | 12 control participants received the intervention | 31/252              | 14/247  | OR 2.33<br>(1.21 to 4.51) | 66 more per 1000 (from 11 to 157 more) | VERY LOW          | Important  |

<sup>1</sup> Serious concerns regarding confounding

<sup>2</sup> Very low number of events (<100)

5. For women during pregnancy and after birth, and for caregivers (P), does any use of home-based records (I), compared with inconsistent use (low use) of any home-based records (C), improve health service outcomes (O)?  
(no studies)

## 6. For women during pregnancy and after birth, and for caregivers (P), does use of different types of home-based records (I) and (C) improve health service outcomes (O)?

### 6.1 Quality of care

#### a. Communication between women/caregivers and health providers

| Quality assessment                                                                        |              |                      |               |              |                           |                      | No. of participants |              | Effect                                                   |                                                      | Certainty (GRADE) | Importance |
|-------------------------------------------------------------------------------------------|--------------|----------------------|---------------|--------------|---------------------------|----------------------|---------------------|--------------|----------------------------------------------------------|------------------------------------------------------|-------------------|------------|
| No. of studies                                                                            | Study design | Risk of bias         | Inconsistency | Indirectness | Imprecision               | Other considerations | Intervention        | Control      | Relative (95% CI)                                        | Absolute (95% CI)                                    |                   |            |
| Communication: providers explained everything to them<br>Studies: Homer, 1999 (Australia) |              |                      |               |              |                           |                      |                     |              |                                                          |                                                      |                   |            |
| 1                                                                                         | RCT          | Serious <sup>1</sup> | Not serious   | Not serious  | Very serious <sup>2</sup> | None                 | Not reported        | Not reported | Not reported                                             | Statistically significant effect on outcome (P=0.03) | VERY LOW          | Important  |
| Communication: records helped talk with doctors<br>Studies: Homer, 1999 (Australia)       |              |                      |               |              |                           |                      |                     |              |                                                          |                                                      |                   |            |
| 1                                                                                         | RCT          | Serious <sup>1</sup> | Not serious   | Not serious  | Very serious <sup>3</sup> | None                 | 60/65               | 58/62        | OR 0.83 (0.21 to 3.24)                                   | Not calculated                                       | VERY LOW          | Important  |
| Communication: easier to talk with doctors<br>Studies: Elbourne, 1987 (UK)                |              |                      |               |              |                           |                      |                     |              |                                                          |                                                      |                   |            |
| 1                                                                                         | RCT          | Serious <sup>4</sup> | Not serious   | Not serious  | Very serious <sup>5</sup> | None                 | 48/132              | 25/119       | Rate Ratio 1.73 (1.16 to 2.59)<br>OR 2.15 (1.22 to 3.78) | 154 more per 1000 (from 35 to 291 more)              | VERY LOW          | Important  |

<sup>1</sup> High risk for selection, performance, and attrition bias

<sup>2</sup> Unable to assess number of events as not reported

<sup>3</sup> Small sample size (less than 300 events)

<sup>4</sup> High risk for selection, performance, detection and attrition bias

<sup>5</sup> Small number of events (less than 100)

## b. Satisfaction with services

| Quality assessment                                                        |              |                           |                      |                      |                           |                      | No. of participants                                       |                                                            | Effect                                                                    |                                         | Certainty (GRADE) | Importance |
|---------------------------------------------------------------------------|--------------|---------------------------|----------------------|----------------------|---------------------------|----------------------|-----------------------------------------------------------|------------------------------------------------------------|---------------------------------------------------------------------------|-----------------------------------------|-------------------|------------|
| No. of studies                                                            | Study design | Risk of bias              | Inconsistency        | Indirectness         | Imprecision               | Other considerations | Intervention                                              | Control                                                    | Relative (95% CI)                                                         | Absolute (95% CI)                       |                   |            |
| Satisfaction with services: satisfaction                                  |              |                           |                      |                      |                           |                      |                                                           |                                                            |                                                                           |                                         |                   |            |
| Studies: Lovell, 1987 (UK); Elbourne, 1987 (UK)                           |              |                           |                      |                      |                           |                      |                                                           |                                                            |                                                                           |                                         |                   |            |
| 2                                                                         | RCTs         | Very serious <sup>1</sup> | Serious <sup>2</sup> | Serious <sup>3</sup> | Not serious               | None                 | 66/95 (Lovell, 1987)<br>No data provided (Elbourne, 1987) | 58/102 (Lovell, 1987)<br>No data provided (Elbourne, 1987) | OR 1.73 (0.96 to 3.1) (Lovell, 1987)<br>No data provided (Elbourne, 1987) | Not calculated                          | VERY LOW          | Important  |
| Satisfaction with services: Feeling in control during antenatal care      |              |                           |                      |                      |                           |                      |                                                           |                                                            |                                                                           |                                         |                   |            |
| Study: Elbourne, 1987 (UK)                                                |              |                           |                      |                      |                           |                      |                                                           |                                                            |                                                                           |                                         |                   |            |
| 1                                                                         | RCT          | Serious <sup>1</sup>      | Not serious          | Not serious          | Very serious <sup>4</sup> | None                 | Enhanced feeling of control: 66/132                       | Enhanced feeling of control: 41/119                        | Rate Ratio 1.45 (1.08 to 1.95)                                            | 155 more per 1000 (from 28 to 327 more) | VERY LOW          | Important  |
| Satisfaction with services: Positive comments included a sense of control |              |                           |                      |                      |                           |                      |                                                           |                                                            |                                                                           |                                         |                   |            |
| Study: Homer, 1999 (Australia)                                            |              |                           |                      |                      |                           |                      |                                                           |                                                            |                                                                           |                                         |                   |            |
| 1                                                                         | RCT          | Serious <sup>5</sup>      | Not serious          | Serious <sup>6</sup> | Serious <sup>7</sup>      | None                 | Positive comments, including a sense of control: 58/65    | Positive comments, including a sense of control: 55/62     | OR 1.05 (0.35 to 3.2)                                                     | Not calculated                          | VERY LOW          | Important  |

<sup>1</sup> High risk for selection, performance, detection and attrition bias

<sup>2</sup> More frequently satisfied with aspects of care approaching significance for ability to choose companion during labour (Lovell, 1987))

<sup>3</sup> Population comprised of a higher proportion of one-parent families, high unemployment rate and a quarter of sample included West Indian and other groups disproportionately affected by social-deprivation

<sup>4</sup> Small number of events

<sup>5</sup> High risk for selection, performance and attrition bias

<sup>6</sup> Proxy measure of outcome (indirect evidence)

<sup>7</sup> Small sample size
